# Supplementary material
Source: PubMed Central journal article supplement (PMC5796663)
Supplement: NIHMS914734-supplement-Supplementary_Figure_1.pdf [file NIHMS914734-supplement-Supplementary_Figure_1.pdf]

Figure 2c

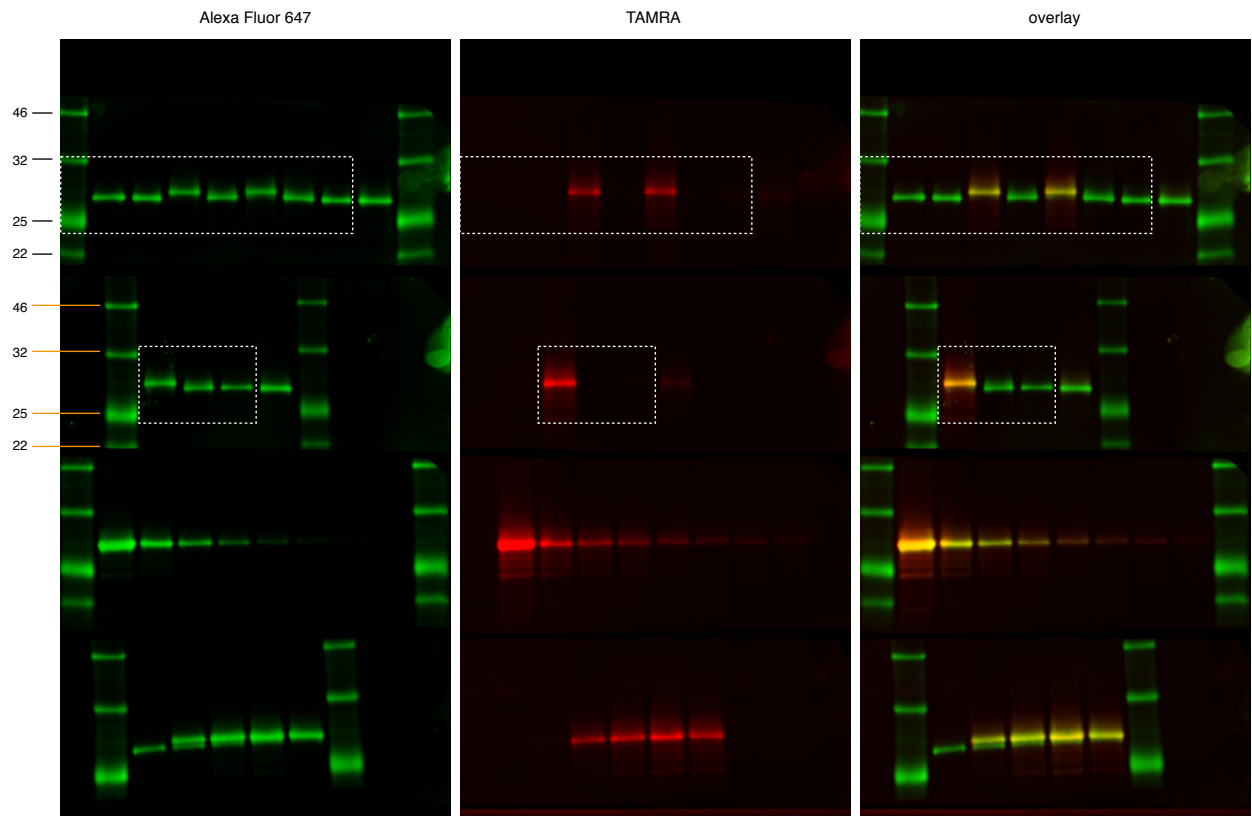

Figure 3b

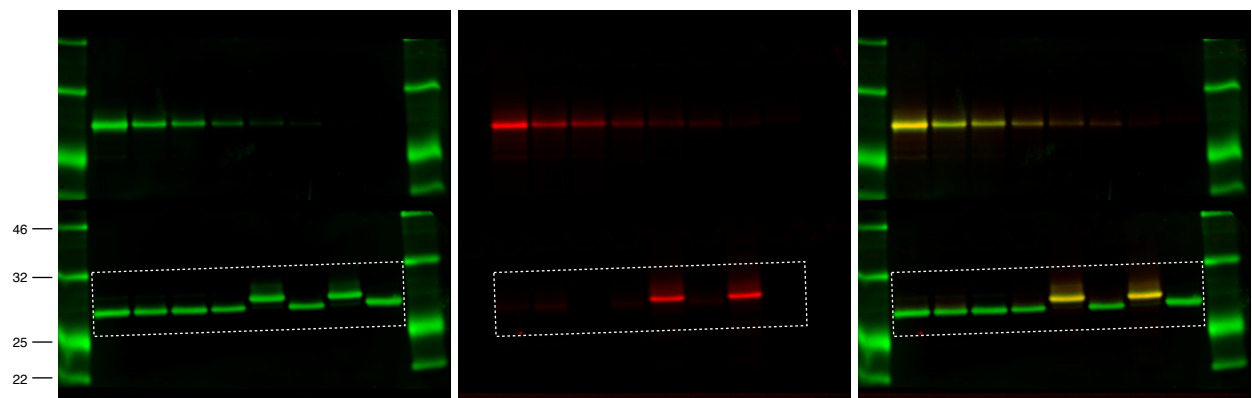

**Supplementary Figure 1 | Uncropped scans with size marker indicators.** Contiguous Alexa Fluor 647 and TAMRA images are each one simultaneous scan of multiple blots in parallel

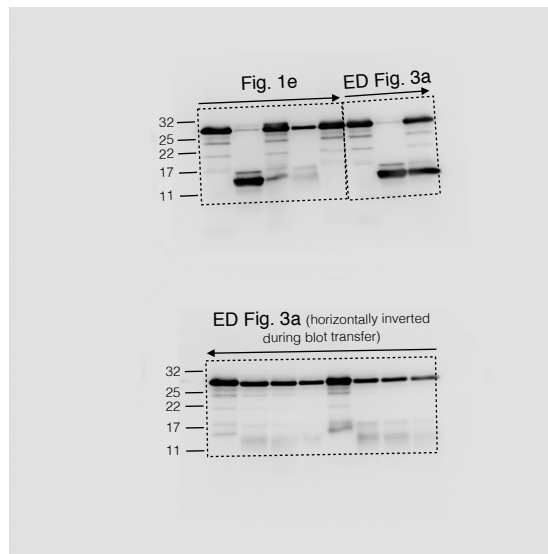

Extended Data Figure 4a

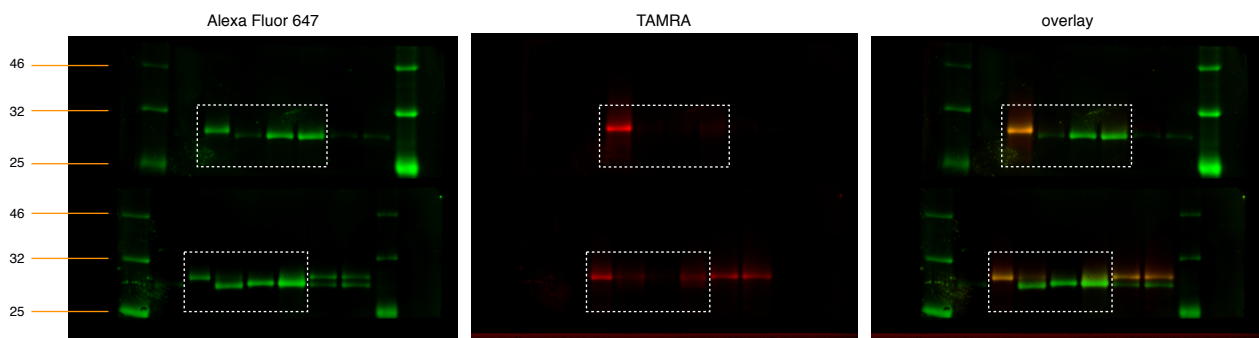

Extended Data Figure 5a

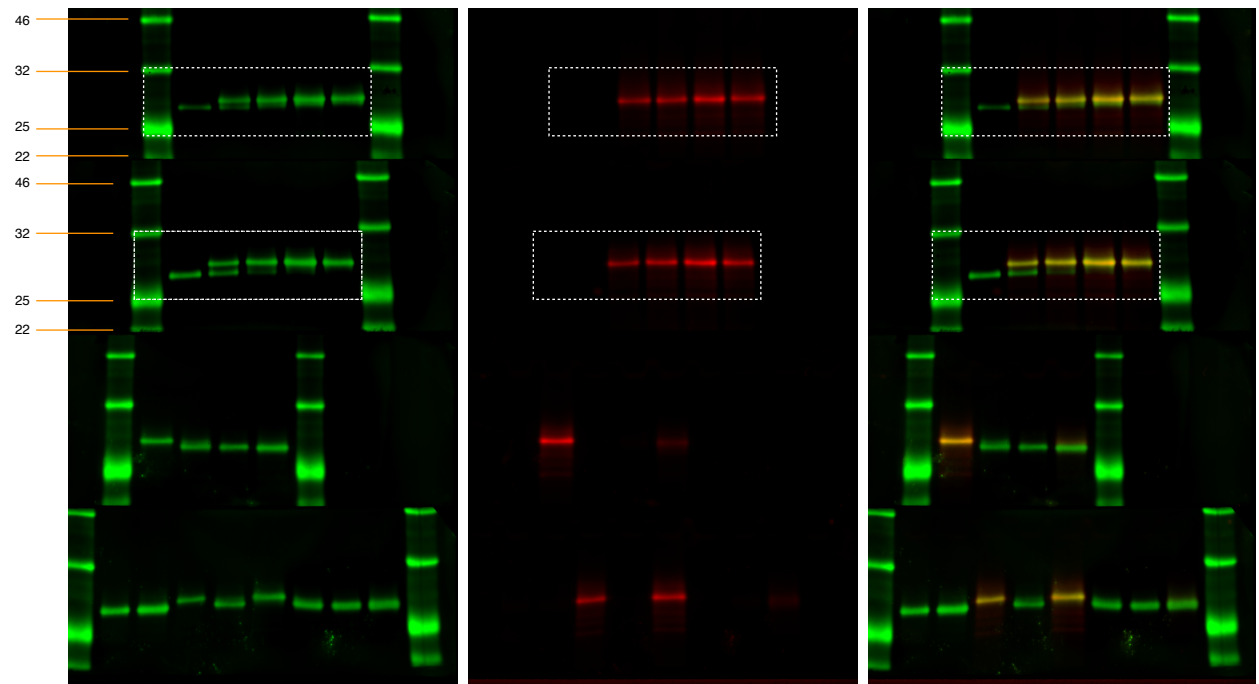

**Supplementary Figure 1 | Uncropped scans with size marker indicators.** Contiguous Alexa Fluor 647 and TAMRA images are each one simultaneous scan of multiple blots in parallel
